# Supplementary material for: Challenges in Effective Referral of Cardiovascular Diseases in Nepal: A Qualitative Study from Health Workers’ and Patients’ Perspective
Source: Hindawi journal article supplement (doi:10.1155/2024/5583709), 2024-03-05
Supplement: f1 [file 5583709.f1.zip]

**Table 1: Characteristics of the respondents (Supplementary material 1)**

| <b>Characteristics</b>                                               | <b>Frequency (%)<br/>(N=57)</b> |
|----------------------------------------------------------------------|---------------------------------|
| <b>Classification of respondents</b>                                 |                                 |
| Tertiary level healthcare providers                                  | 15 (26.32%)                     |
| Secondary level healthcare providers                                 | 10 (17.54%)                     |
| Primary level healthcare providers                                   | 10 (17.54%)                     |
| CVD patients (MI and Stroke)                                         | 22 (38.60%)                     |
| <b>Sex of the respondents</b>                                        |                                 |
| Male                                                                 | 35 (61.40%)                     |
| Female                                                               | 22 (38.60%)                     |
| <b>Age, mean (SD) years</b>                                          | 43.7 ± 13.4 years               |
| <b>Years of experience of health workers (n=35), mean (SD) years</b> | 11.7±11.2                       |
| <b>Educational Qualification</b>                                     |                                 |
| Masters and above                                                    | 14 (24.56%)                     |
| Bachelor's degree                                                    | 14 (24.56%)                     |
| Intermediate level                                                   | 14 (24.56%)                     |
| Secondary or below                                                   | 12 (21.05%)                     |
| No education                                                         | 3 (5.26%)                       |
