# Supplementary material for: Challenges in Effective Referral of Cardiovascular Diseases in Nepal: A Qualitative Study from Health Workers’ and Patients’ Perspective
Source: Hindawi journal article supplement (doi:10.1155/2024/5583709), 2024-03-05
Supplement: f1 [file 5583709.f1.zip]

**Table 2: Challenges to Referral Summarized (Supplementary material 2)**

| <b>Personal Level Factors</b>                             | <b>Environmental Level Factors</b>              | <b>Health System Level Factors</b>                           | <b>Policy Level Factors</b>                            |
|-----------------------------------------------------------|-------------------------------------------------|--------------------------------------------------------------|--------------------------------------------------------|
| Self referral leading to overcrowding at tertiary centers | Lack of access to transportation in rural areas | Lack of formal referral protocol                             | Insufficient financial support from government schemes |
| Unnecessary cases referred to specialized centers         |                                                 | Lack of formal referral forms and letters                    | Inadequate national health insurance coverage          |
| Self arrangement of transportation from patient party     |                                                 | Lack of CVD manpower and resources at lower level healthcare |                                                        |
|                                                           |                                                 | Centralization of CVD specific services                      |                                                        |
|                                                           |                                                 | Lack of communication before referral                        |                                                        |
|                                                           |                                                 | No attending medical personnel during patient transfer       |                                                        |
|                                                           |                                                 | Referral solely based on bed availability                    |                                                        |
